# Supplementary material for: Incidence of type 2 diabetes in familial combined hyperlipidemia
Source: PubMed Central journal article supplement — BMJ Open Diabetes Res Care. 2020 Mar 18;8(1):e001107. doi: 10.1136/bmjdrc-2019-001107 (PMC7103854; doi:10.1136/bmjdrc-2019-001107), 2020-03-18
Supplement: bmjdrc-2019-001107supp001.pdf [file bmjdrc-2019-001107supp001.pdf]

**Supplementary Table 1. Overview of incident cases of type 2 diabetes in study population, stratified by type of visit and treatment**

|                       | Spouses       |            |                  | Unaffected relatives |            |                  | FCHL patients |            |                  |
|-----------------------|---------------|------------|------------------|----------------------|------------|------------------|---------------|------------|------------------|
|                       | self-reported | confirmed* | newly diagnosed# | self-reported        | confirmed* | newly diagnosed# | self-reported | confirmed* | newly diagnosed# |
| Questionnaire only, n | 2             | 2          | -                | 1                    | 1          | -                | 5             | 5          | -                |
| - Diet (n)            | (1)           | (1)        | -                | (0)                  | (0)        | -                | (0)           | (0)        | -                |
| - Oral (n)            | (1)           | (1)        | -                | (1)                  | (1)        | -                | (3)           | (3)        | -                |
| - Insulin (n)         | (0)           | (0)        | -                | (0)                  | (0)        | -                | (2)           | (2)        | -                |
| Clinical visit, n     | 3             | 3          | 0                | 9                    | 9          | 1                | 16            | 16         | 2                |
| - Diet (n)            | (0)           | (0)        | -                | (0)                  | (0)        | -                | (2)           | (2)        | -                |
| - Oral (n)            | (3)           | (3)        | -                | (7)                  | (7)        | -                | (12)          | (12)       | -                |
| - Insulin (n)         | (0)           | (0)        | -                | (2)                  | (2)        | -                | (2)           | (2)        | -                |
| <b>Total</b>          | <b>5</b>      | <b>5</b>   | <b>0</b>         | <b>10</b>            | <b>10</b>  | <b>1</b>         | <b>21</b>     | <b>21</b>  | <b>2</b>         |

\* Used as the primary outcome measure in this study

# Diagnosed by fasting plasma glucose measurement during the clinical visit

**Supplementary Table 2. Cox's proportional hazard regression models of incident type 2 diabetes\* in overall cohort and ultrasound subcohort**

| <b>OVERALL COHORT</b>                 | <b>Unaffected relatives versus spouses</b> |               |          | <b>FCHL patients versus spouses</b> |               |          |
|---------------------------------------|--------------------------------------------|---------------|----------|-------------------------------------|---------------|----------|
| <b>Model, adjusted for</b>            | <b>HR</b>                                  | <b>95% CI</b> | <b>p</b> | <b>HR</b>                           | <b>95% CI</b> | <b>p</b> |
| 1. Crude                              | 1.0                                        | 0.3-2.8       | 0.97     | 6.8                                 | 2.6-18.0      | <0.001   |
| 2. Age + sex                          | 1.1                                        | 0.4-3.3       | 0.10     | 6.5                                 | 2.5-17.2      | <0.001   |
| 3. model 2 + alcohol                  | 1.5                                        | 0.5-4.8       | 0.52     | 6.9                                 | 2.3-20.4      | 0.001    |
| 4. model 3 + waist                    | 1.4                                        | 0.4-4.7       | 0.41     | 5.0                                 | 1.6-15.1      | 0.005    |
| 5. model 4 + HOMA2-IR                 | 2.2                                        | 0.6-8.4       | 0.23     | 4.0                                 | 1.1-14.7      | 0.04     |
| 6. model 5 + FLI $\geq$ 60            | 2.0                                        | 0.5-7.4       | 0.31     | 3.1                                 | 0.8-11.7      | 0.09     |
| <b>ULTRASOUND SUBCOHORT</b>           | <b>Unaffected relatives versus spouses</b> |               |          | <b>FCHL patients versus spouses</b> |               |          |
| <b>Model, adjusted for</b>            | <b>HR</b>                                  | <b>95% CI</b> | <b>p</b> | <b>HR</b>                           | <b>95% CI</b> | <b>p</b> |
| 1. Crude                              | 3.6                                        | 0.4-29.7      | 0.23     | 10.5                                | 1.3-85.5      | 0.03     |
| 2. Age + sex                          | 3.7                                        | 0.4-30.5      | 0.22     | 9.2                                 | 1.1-76.1      | 0.04     |
| 3. model 2 + VAT-US + SAT-US          | 2.9                                        | 0.3-24.3      | 0.33     | 5.5                                 | 0.6-47.2      | 0.12     |
| 4. model 3 + HOMA2-IR                 | 3.0                                        | 0.4-26.1      | 0.31     | 4.8                                 | 0.6-41.0      | 0.15     |
| 5. model 4 + fatty liver <sup>#</sup> | 2.5                                        | 0.3-21.7      | 0.41     | 3.8                                 | 0.4-33.0      | 0.23     |

\* clinically diagnosed and newly diagnosed T2D were combined as an outcome measure in this sensitivity analysis

# determined by ultrasound

Abbreviations: HOMA2-IR: homeostasis model assessment insulin resistance; FLI: fatty liver index VAT-US: visceral adipose tissue determined by ultrasound; SAT-US: subcutaneous adipose tissue determined by ultrasound
